# Supplementary material
Source: Royal Society of Chemistry journal article supplement (https://www.rsc.org/suppdata/dt/1999/1835/810020i.doc)
Supplement: Supplementary file 1 [file 810020i.doc]

**Table *** Crystal and refinement data for three [Cu(bipy)2X]Y complexes - preliminary data.

All three structures showed no disorder on the cation, but **15** and **30** involved unresolved disorder on the anions present.

Y  **15 27 30**

Chemical Formula C24H16N4ClCuF9O3S C20H16N4CuI2 C21H16N4F3CuIO3S

Formula Weight 709.98 629.724 639.97

Crystal System Triclinic Triclinic Triclinic

Space Group *P*~~1~~ *P*~~1~~ *P*~~1~~

*a* (Å) 8.701(2) 7.424(2) 7.571(1)

*b* (Å) 13.225(2) 10.554(2) 12.022(2)

*c* (Å) 13.256(3) 14.315(3) 14.147(3)

_ (o) 71.92(2) 108.21(1) 109.88(1)

_ (o) 78.16(2) 95.42(2) 97.01(2)

_ (o) 70.60(2) 98.75(2) 101.88(2)

*Z* 2 2 2

*V* (Å-3) 1358.82 1040.91 1158.82

*R =* (*__/_*_*Fo*_) 0.1197 0.0573 0.1053

*Rw =* (*__w*½/*_*_*Fo*_*w*½*)* 0.1221 0.0572 0.1057

Temperature (K) 298 298 298
